# Supplementary material
Source: PubMed Central journal article supplement (PMC5759961)
Supplement: NIHMS928972-supplement-Suppl_Data.pdf [file NIHMS928972-supplement-Suppl_Data.pdf]

**Supplemental Table.** Number of nipple-sparing mastectomies and non-nipple sparing mastectomies annually in California, 1996-2013

|                   | Non-Nipple Sparing Mastectomy |       | Nipple-Sparing Mastectomy |       | All Patients |
|-------------------|-------------------------------|-------|---------------------------|-------|--------------|
|                   | N                             | Row % | N                         | Row % | N            |
| Year of diagnosis |                               |       |                           |       |              |
| 1988              | 5,924                         | 99.8  | 14                        | 0.2   | 5,938        |
| 1989              | 5,767                         | 99.8  | 9                         | 0.2   | 5,776        |
| 1990              | 5,764                         | 99.7  | 19                        | 0.3   | 5,783        |
| 1991              | 5,865                         | 99.7  | 17                        | 0.3   | 5,882        |
| 1992              | 7,550                         | 99.7  | 26                        | 0.3   | 7,576        |
| 1993              | 6,898                         | 99.6  | 31                        | 0.4   | 6,929        |
| 1994              | 6,684                         | 99.7  | 20                        | 0.3   | 6,704        |
| 1995              | 6,813                         | 99.9  | 10                        | 0.1   | 6,823        |
| 1996              | 6,507                         | 99.8  | 12                        | 0.2   | 6,519        |
| 1997              | 6,470                         | 99.9  | 9                         | 0.1   | 6,479        |
| 1998              | 6,342                         | 100.0 | <5                        | <0.1  | 6,344        |
| 1999              | 6,200                         | 99.8  | 15                        | 0.2   | 6,215        |
| 2000              | 6,308                         | 99.9  | 8                         | 0.1   | 6,316        |
| 2001              | 6,388                         | 99.8  | 12                        | 0.2   | 6,400        |
| 2002              | 6,129                         | 99.9  | 7                         | 0.1   | 6,136        |
| 2003              | 5,595                         | 99.8  | 13                        | 0.2   | 5,608        |
| 2004              | 5,621                         | 99.8  | 14                        | 0.2   | 5,635        |
| 2005              | 5,459                         | 99.7  | 14                        | 0.3   | 5,473        |
| 2006              | 5,531                         | 99.6  | 21                        | 0.4   | 5,552        |
| 2007              | 5,642                         | 99.7  | 17                        | 0.3   | 5,659        |
| 2008              | 5,836                         | 99.4  | 35                        | 0.6   | 5,871        |
| 2009              | 5,635                         | 99.4  | 33                        | 0.6   | 5,668        |
| 2010              | 5,630                         | 98.9  | 64                        | 1.1   | 5,694        |
| 2011              | 5,549                         | 98.4  | 90                        | 1.6   | 5,639        |
| 2012              | 5,378                         | 96.3  | 205                       | 3.7   | 5,583        |
| 2013              | 5,114                         | 94.9  | 276                       | 5.1   | 5,390        |
